# Supplementary material
Source: PubMed Central journal article supplement (PMC7201375)

## Supplementary Online Content

Mehta N, Kalra A, Nowacki AS, et al. Association of use of angiotensin-converting enzyme inhibitors and angiotensin II receptor blockers with testing positive for coronavirus disease 2019 (COVID-19). *JAMA Cardiol*. Published online May 5, 2020. doi:10.1001/jamacardio.2020.1855

**eFigure.** Propensity-score distributions according to ACEI and ARB usage status

This supplementary material has been provided by the authors to give readers additional information about their work.

**eFigure.** Propensity-score distributions according to ACEI and ARB usage status for: (A) all tested patients and (B) all test-positive patients. Boxplots illustrate the median and first/third quartiles with a star to indicate the mean.

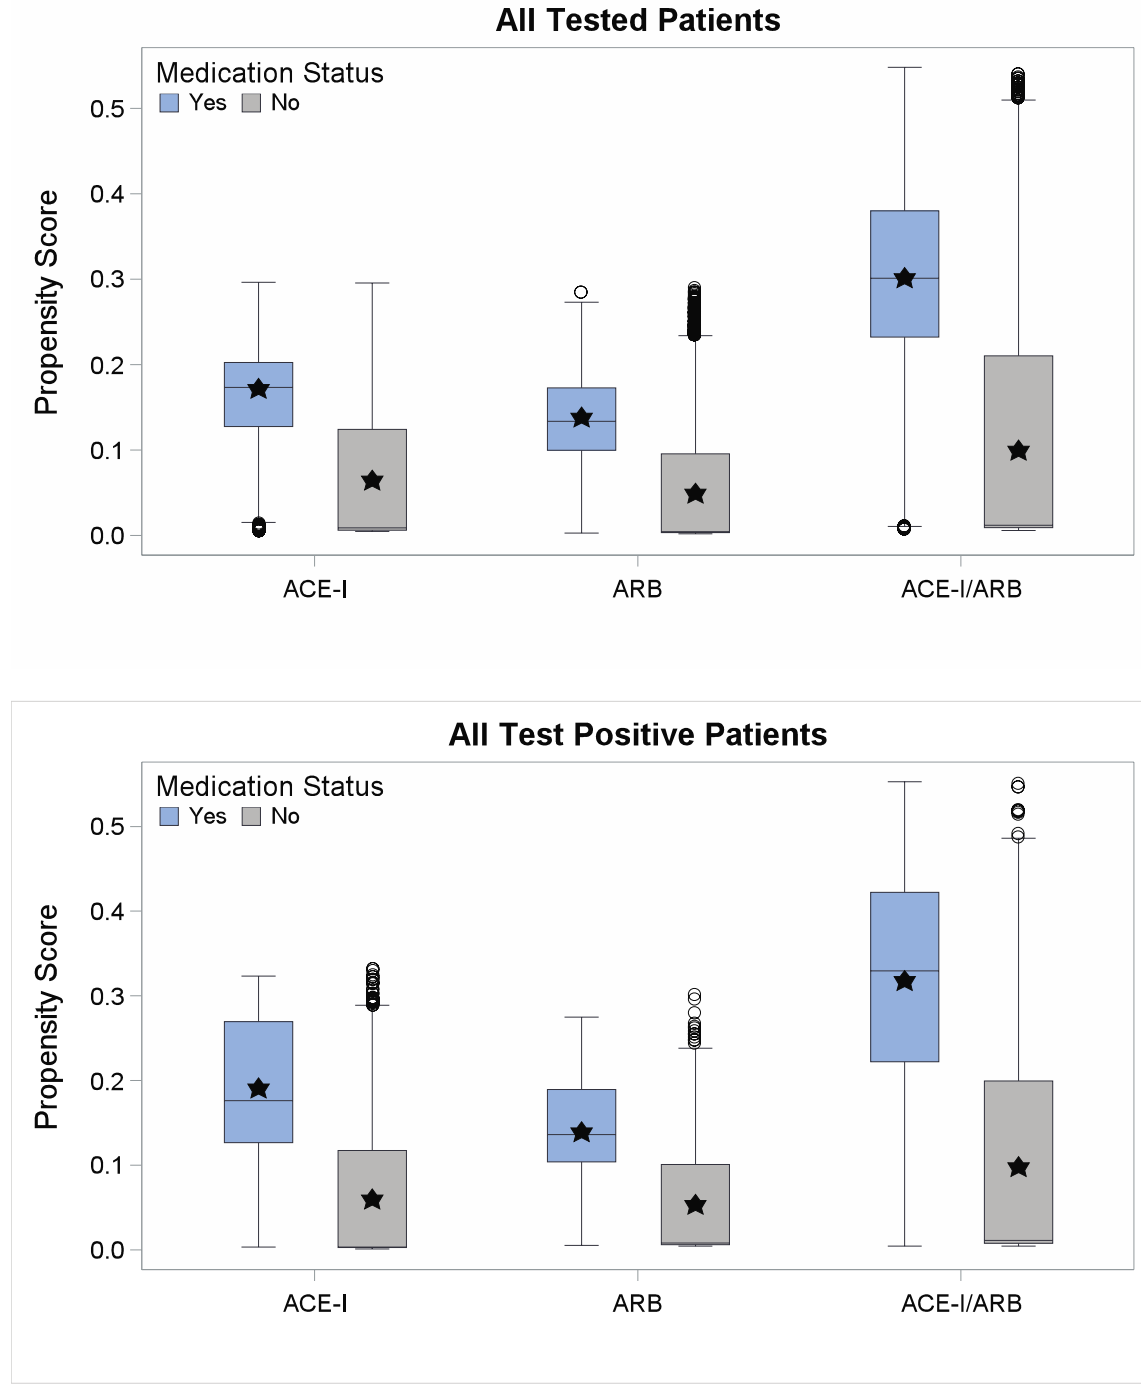

Supplement: jamacardiol-e201855-s001.pdf [file jamacardiol-e201855-s001.pdf]
